# Supplementary material
Source: publisher figshare collection journal article supplement (https://acs.figshare.com/ndownloader/files/4653229)
Supplement: Supplementary file 1 [file 4653229]

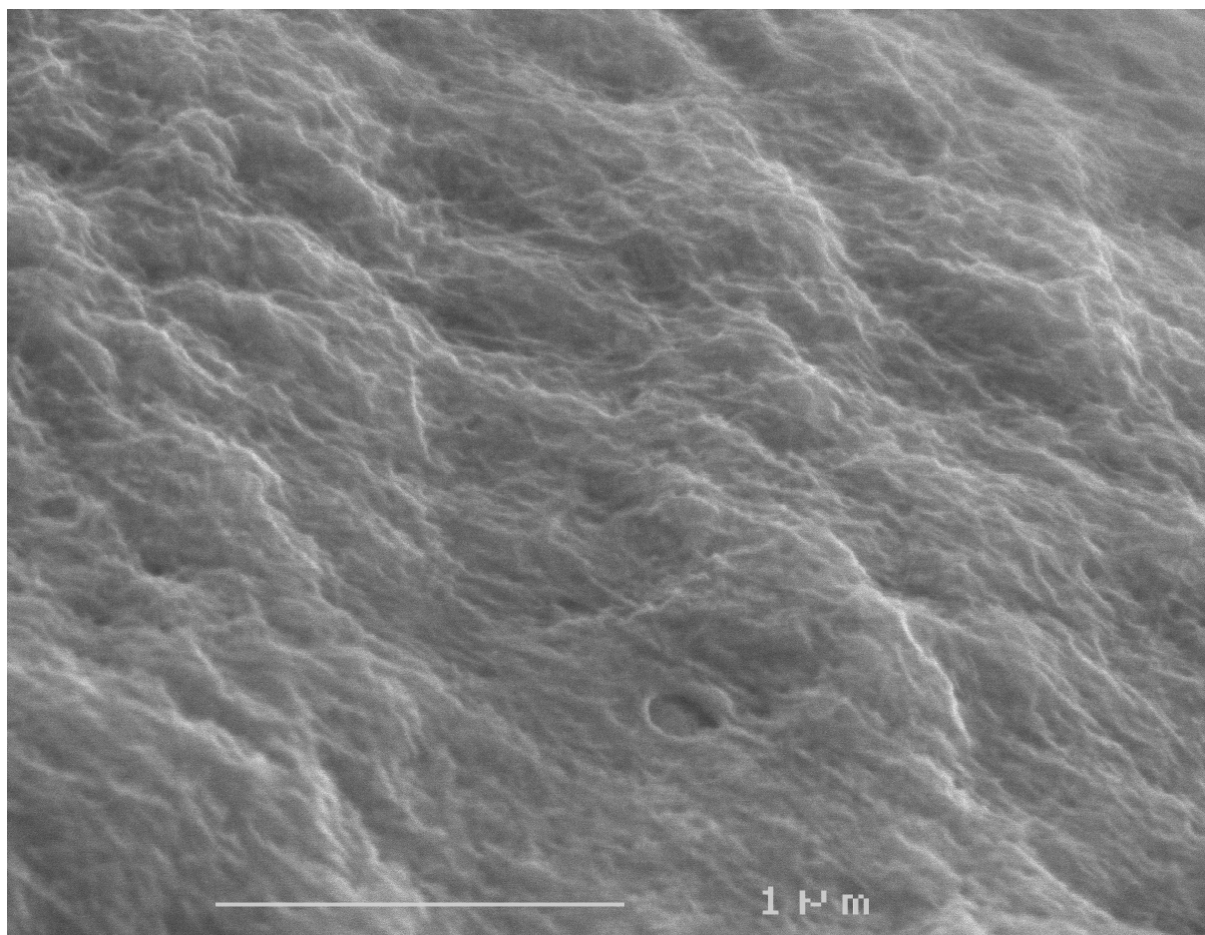

Figure 5. Enlarged version of a SEM picture showing the surface of a microcapsule with seven layers (Figure 4d).
